# Supplementary material
Source: publisher figshare collection journal article supplement (https://acs.figshare.com/ndownloader/files/4405414)
Supplement: Supplementary file 1 [file 4405414]

# Supporting information

## DMSO-induced denaturation of hen egg white lysozyme

### 1 Small angle neutron scattering

We demonstrate the effect of subtracting different values for the incoherent background on small angle neutron scattering profiles and the corresponding Kratky representations and pair-distance-distribution functions,  $p(r)$  of two samples containing lysozyme in a folded state ( $30 \text{ g l}^{-1}$  at  $\phi_{\text{DMSO}} = 0$ ) and unfolded state ( $10 \text{ g l}^{-1}$  at  $\phi_{\text{DMSO}} = 0.8$ ) in Figures S1, S2, and S3. As  $0.011$  and  $0.0012 \text{ cm}^{-1}$  correspond to the incoherent background to be subtracted from the profiles in Figures S1-S3a and S1-S3b, all other values correspond to incorrect background corrections, namely too little ( $0 \text{ cm}^{-1}$ ) or too much ( $0.024$ ,  $0.049$ ,  $0.0022$ , and  $0.0029 \text{ cm}^{-1}$ ). It is clear that the Kratky representations are particularly sensitive to the background subtraction and that the  $p(r)$  only starts in the origin  $(0,0)$  when too much background is subtracted. The latter is due to the fact that lysozyme is not a homogeneous particle at length scales corresponding to the highest  $q$  values probed; i.e., the Porod regime ( $q^{-4}$  decay) lies outside of the accessible  $q$ -range. This leads to a lack of information at very small values of  $r$  in the  $p(r)$  function. However, the values for  $R_g$  and  $I(0)$  tabulated in in the main document (Table 1) are only marginally affected. By contrast, it is clear from Figure S1 that the effect of background subtraction on  $S_0$  is more pronounced. In Table 1 we have listed the mean values and corresponding standard deviations as determined for three different background subtractions (no subtraction, correct subtraction, and slight over subtraction, see for example the  $0$ ,  $0.011$ , and  $0.024$

scattering profiles in Figure S1a).

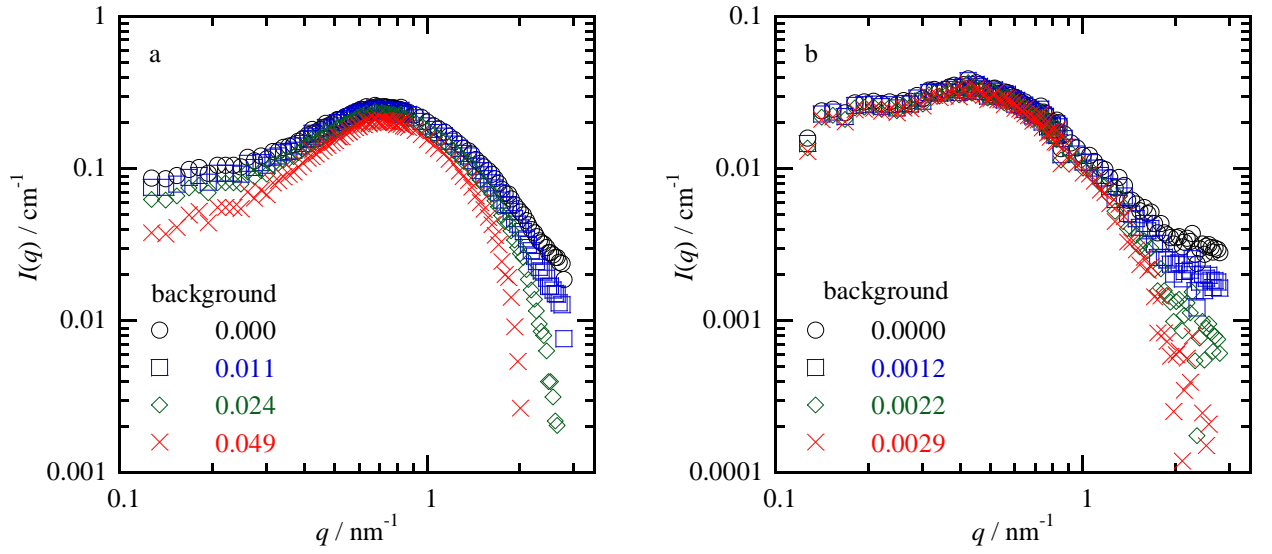

**Figure S1.** Small angle neutron scattering profiles,  $I(q)$  versus  $q$ , for a (a) 30 g l<sup>-1</sup> lysozyme solution at  $\phi_{\text{DMSO}} = 0$  and a (b) 10 g l<sup>-1</sup> lysozyme solution at  $\phi_{\text{DMSO}} = 0.8$  after subtraction of incoherent background as indicated.

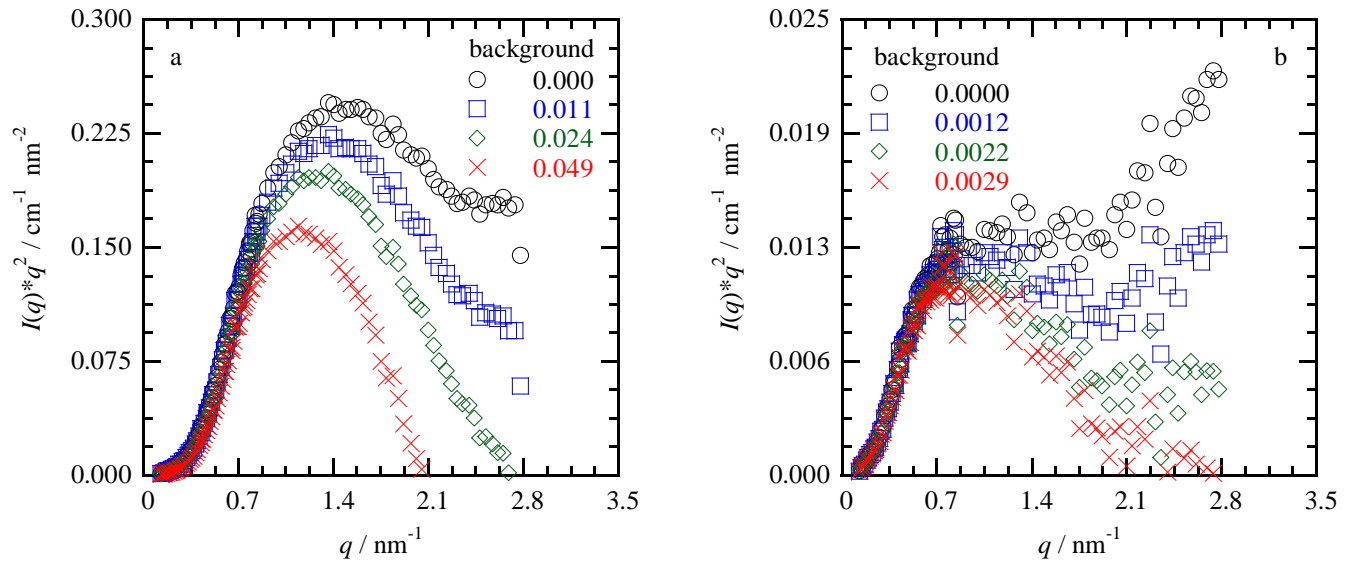

**Figure S2.** Kratky representations ( $I(q) \cdot q^2$  versus  $q$ ) for a (a) 30 g l<sup>-1</sup> lysozyme solution at  $\phi_{\text{DMSO}} = 0$  and a (b) 10 g l<sup>-1</sup> lysozyme solution at  $\phi_{\text{DMSO}} = 0.8$  after subtraction of incoherent background as indicated.

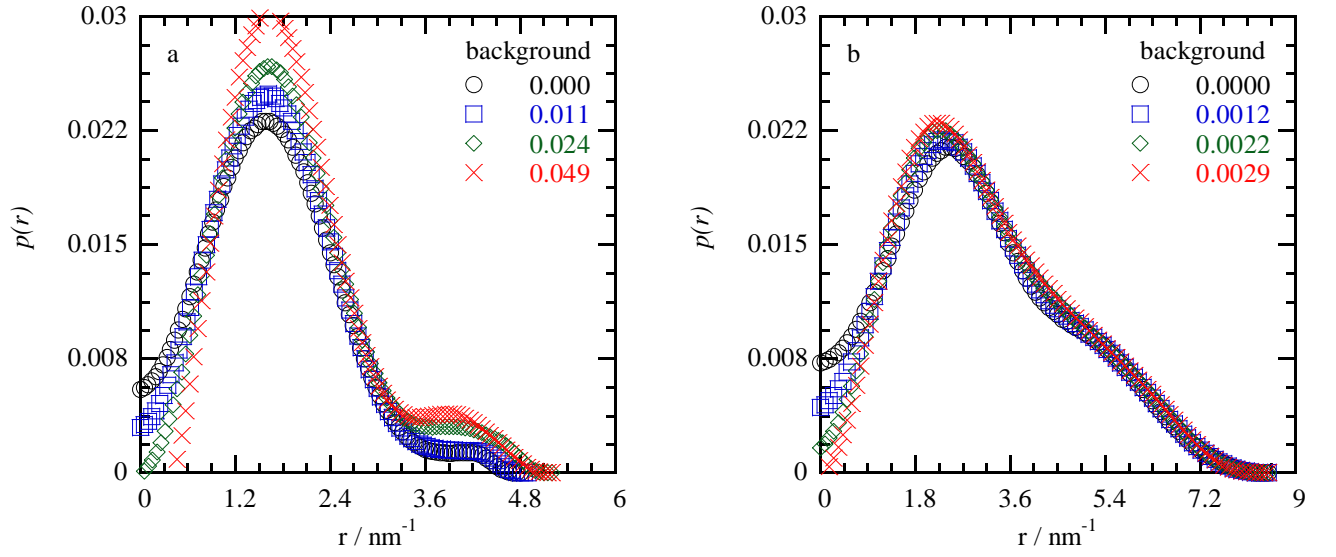

**Figure S3.** Pair distance distribution functions,  $p(r)$  for a (a) 30 g l<sup>-1</sup> lysozyme solution at  $\phi_{\text{DMSO}} = 0$  and a (b) 10 g l<sup>-1</sup> lysozyme solution at  $\phi_{\text{DMSO}} = 0.8$  after subtraction of incoherent background as indicated. The curves have been normalised to a total area of 1.

## 2 Input values for light and neutron scattering

**Table S1:** Refractive indices of the sample,  $n_{\text{sample}}$ , and the specific refractive index increment of the sample,  $\frac{dn}{dC}$  as a function of the DMSO volume fraction,  $\phi_{\text{DMSO}}$ , for lysozyme concentrations,  $C_{\text{LYS}} = 9.1 - 9.5$  g l<sup>-1</sup> used to calculate the values for  $S_{90}$  as depicted in Figures 2 and 7 in the main text. The scattering length density of lysozyme,  $\rho_{\text{lysozyme}}$ , and solvent,  $\rho_{\text{solvent}}$  as a function of  $\phi_{\text{DMSO}}$  used to determine the measured molecular weight of lysozyme in Table 1 in the main text.

| $\phi_{\text{DMSO}}$ | $n_{\text{sample}}$ | $\frac{dn}{dC}$ | $\rho_{\text{lysozyme}} / 10^{10} \text{ cm}^{-2}$ | $\rho_{\text{solvent}} / 10^{10} \text{ cm}^{-2}$ |
|----------------------|---------------------|-----------------|----------------------------------------------------|---------------------------------------------------|
| 0                    | 1.3319              | 0.0001535       | 3.08                                               | 6.37                                              |

|     |        |           |      |      |
|-----|--------|-----------|------|------|
| 0.1 | 1.3490 | 0.0001465 | 3.08 | 6.26 |
| 0.2 | 1.3656 | 0.0001388 | 3.08 | 6.15 |
| 0.3 | 1.3816 | 0.0001307 | 3.08 | 6.04 |
| 0.4 | 1.3969 | 0.0001221 | 3.08 | 5.92 |
| 0.5 | 1.4099 | 0.0001129 | 3.08 | 5.81 |
| 0.6 | 1.4255 | 0.0001037 | 3.08 | 5.70 |
| 0.7 | 1.4396 | 0.0000965 | 3.49 | 5.59 |
| 0.8 | 1.4523 | 0.0000812 | 3.49 | 5.48 |
| 0.9 | 1.4635 | 0.0000648 | 3.49 | 5.37 |
| 1.0 | 1.4732 | 0.0000644 | 1.93 | 5.26 |

---
